# Supplementary material for: Co-doped Ni–Mo oxides: highly efficient and robust electrocatalysts for urea electrooxidation assisted hydrogen production
Source: Royal Society of Chemistry journal article supplement (doi:10.1039/d2ta04728d), 2022-01-01
Supplement: d2ta04728d1.pdf [file d2ta04728d1.pdf]

Electronic Supplementary Material (ESI)

## **Co-doped Ni-Mo oxides: Highly efficient and robust electrocatalyst for urea electrooxidation assisted hydrogen production**

Xiangyun Liu,<sup>a, b</sup> Hehe Qin,<sup>a, b</sup> Genxiang Wang,<sup>c</sup> Qiuju Li,<sup>a, b</sup> Qisu Huang,<sup>a, b</sup> Zhenhai Wen,<sup>c</sup>  
Shun Mao<sup>\*a, b</sup>

<sup>a</sup> College of Environmental Science and Engineering, Biomedical Multidisciplinary Innovation Research Institute, Shanghai East Hospital, State Key Laboratory of Pollution Control and Resource Reuse, Tongji University, 1239 Siping Road, Shanghai 200092, China. E-mail: shunmao@tongji.edu.cn

<sup>b</sup> Shanghai Institute of Pollution Control and Ecological Security, Shanghai 200092, China

<sup>c</sup> CAS Key Laboratory of Design and Assembly of Functional Nanostructures, Fujian Provincial Key Laboratory of Nanomaterials, Fujian Institute of Research on the Structure of Matter, Chinese Academy of Sciences, Fuzhou 350002, China

## **Text S1. Characterizations**

Field-emission scanning electron microscope (SEM, SU8010) was used to study the morphology and structure of the catalyst. The transmission electron microscopy (TEM) and high-resolution TEM (HRTEM) images were obtained on a FEITecnaï G2 F30 microscope with energy-dispersive X-ray spectroscopy (EDS) attachment. X-ray photoelectron spectroscopy (XPS) results were obtained by PHI Quantera SXM-TM Scanning X-ray Microprobe TM at 20 kV. X-ray diffraction (XRD) patterns were recorded on a Bruker D8 Advance X-ray diffractometer. The inductively coupled plasma-optical emission spectroscopy (ICP-OES) was used to measure the Ni/Co ratio of the catalyst. The ion chromatography (IC) and ultraviolet spectrophotometer (UV-Vis) spectra were used to study the electrolysis products.

## **Text S2. Determination of urea**

The urea was spectrophotometrically determined by the diacetylmonoxime method <sup>[1]</sup>. First, 100 µl aliquot of the solution was removed from the electrolysis cell and diluted to 1 ml. Then, 0.2 ml diluted solution, 2 ml acid-ferric solution (10 ml concentrated phosphoric acid, 30 ml concentrated sulfuric acid, 60 ml deionized water, and 16.67 mg ferric chloride hexahydrate), 1 ml diacetylmonoxime (DAMO)-thiosemicarbazide (TSC) solution (0.5 g DAMO and 10 mg TSC were dissolved in 100 ml deionized water), and 4.8 ml H<sub>2</sub>O were mixed. The solution was heated in water bath at 100°C for 20 minutes. After cooling to room temperature, the absorbance was measured at 525 nm using a UV–Vis spectrophotometer (Shimadzu UV-2700). The concentration–absorbance calibration curve was obtained using standard urea solution (**Fig. S7a**), which contained the same concentrations of electrolytes as used in the electrocatalysis experiments.

### Text S3. Determination of nitrite (NO<sub>2</sub><sup>-</sup>) and nitrate (NO<sub>3</sub><sup>-</sup>)

The amounts of NO<sub>2</sub><sup>-</sup> and NO<sub>3</sub><sup>-</sup> were measured by an ion chromatogram instrument (ICS-2000).

The corresponding calibration curves of NO<sub>2</sub><sup>-</sup> and NO<sub>3</sub><sup>-</sup> are shown in **Fig. S7b-c**.

### Text S4. Energy consumption analysis

The energy consumption (kWh kg<sup>-1</sup> H<sub>2</sub>) was estimated according to the following equation:

$$\text{Energy consumption (kWh kg}^{-1}\text{ H}_2\text{)} = U \times I \times t = U \times I \times \frac{n(\text{H}_2) \times 2F}{I} = n(\text{H}_2) \times 2F \times U$$

where U (V), I (A), n (H<sub>2</sub>) (mol), F (C/mol), and t (s) is the working potential, the current, the amount of hydrogen, faraday constant (96485 C/mol), and reaction time, respectively.

### Text S5. Density functional theory (DFT) simulation

The plane-wave code Vienna ab-initio simulation package (VASP) program was used to perform all the spin-polarized density functional theory (DFT) calculations within the generalized gradient approximation (GGA) using the Perdew-Burke-Ernzerhof (PBE) formulation [2], [3], [4]. The projected augmented wave (PAW) potentials were chosen to describe the ionic cores and take valence electrons into account using a plane-wave basis set with a kinetic energy cutoff of 500 eV [5], [6]. The valence electron configurations applied in this work include 5s<sup>1</sup>4d<sup>5</sup>(Mo), 4s<sup>2</sup>3d<sup>7</sup>(Co), 4s<sup>2</sup>3d<sup>8</sup>(Ni), 2s<sup>2</sup>2p<sup>2</sup> (C), 2s<sup>2</sup>2p<sup>3</sup> (N), 2s<sup>2</sup>2p<sup>4</sup> (O), and 1s<sup>1</sup>(H). Partial occupancies of the Kohn–Sham orbitals were allowed using the Gaussian smearing method with a width of 0.02 eV [7]. The electronic energy was considered self-consistent when the energy change was smaller than 10<sup>-6</sup> eV.

The equilibrium lattice constants of [NiMoO<sub>4</sub>] unit cell was optimized when using a 4×4×5 Monkhorst-Pack k-point grid for Brillouin zone sampling with a = 9.916, b = 8.802, and c = 7.400 Å. These lattice constants were used to build the NiMoO<sub>4</sub> (2 2 -2) surface slab with 5

atomic layers, which contains 24 Ni atoms, 16 Mo atoms, and 72 O atoms. These surfaces mentioned above were chosen since these surfaces were identified by HRTEM images. The Co atom was put in the NiMoO<sub>4</sub> model to consider the effect of doped Co. This slab was separated by a 15 Å vacuum layer in the z-direction between the slab and its periodic images. During structural optimizations of the (2 2 -2) surface model, a 3×3×1 gamma-point centered k-point grid for the Brillouin zone was used. All the atomic layers were allowed to fully relax.

The adsorption energy ( $E_{\text{ads}}$ ) of an adsorbate (A) was defined as:

$$E_{\text{ads}} = E_{\text{A/surf}} - E_{\text{surf}} - E_{\text{A}},$$

where  $E_{\text{A/surf}}$ ,  $E_{\text{surf}}$ , and  $E_{\text{A}}$  is the energy of A adsorbed on the surface slab, the energy of surface slab, and the energy of adsorbate, respectively.

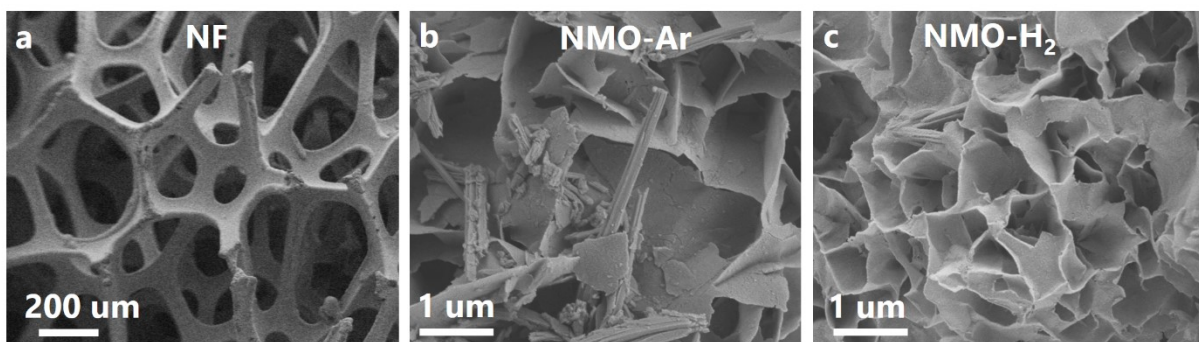

**Figure S1.** SEM images of (a) NF, (b) NMO-Ar, and (c) NMO-H<sub>2</sub>.

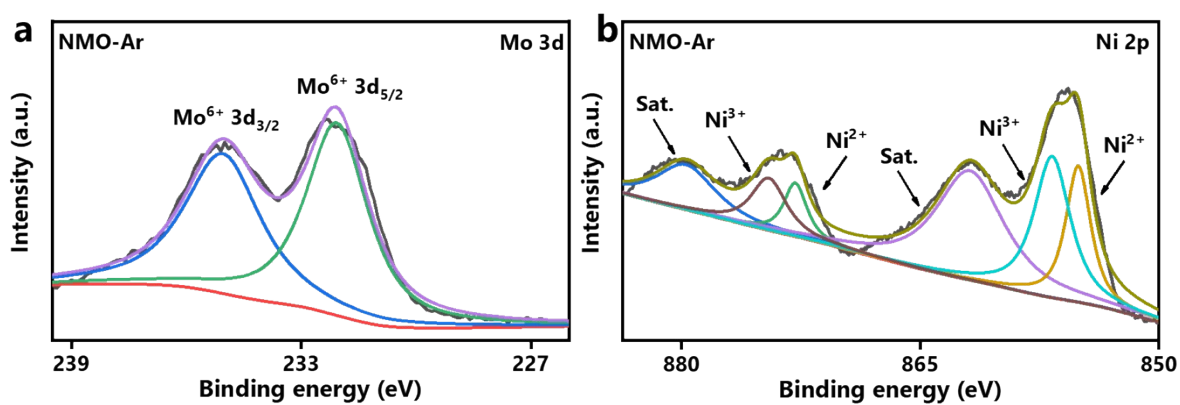

**Figure S2.** XPS spectra of Mo 3d and Ni 2p in NMO-Ar.

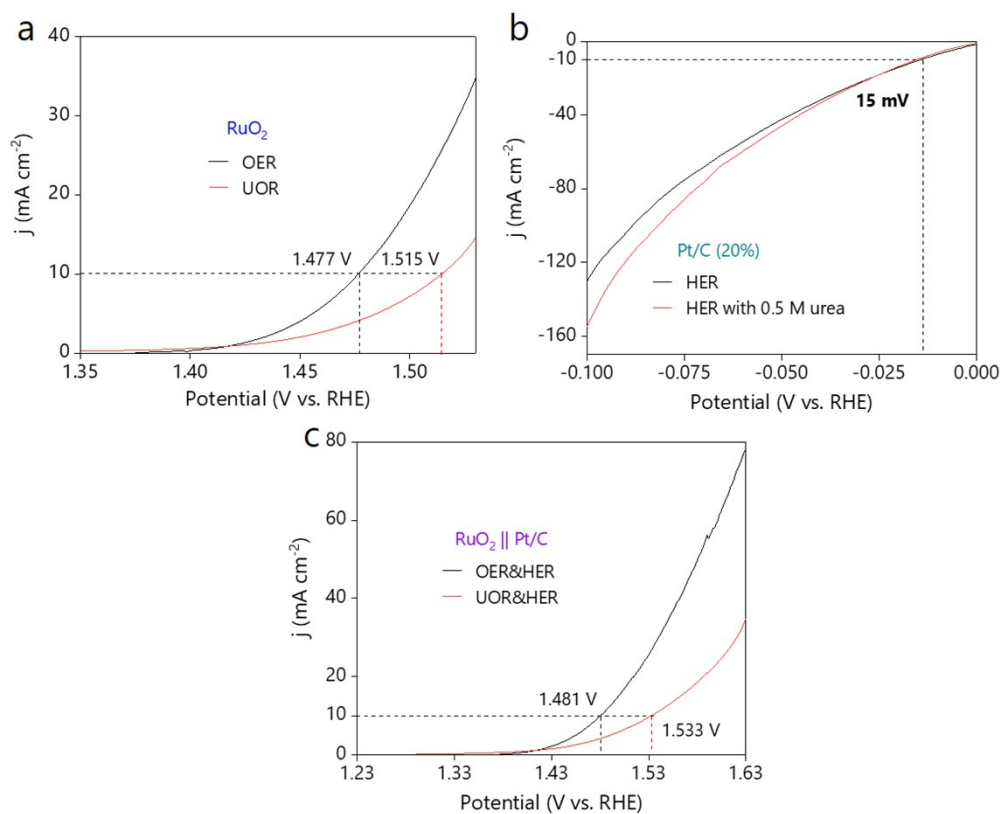

**Figure S3.** (a) Polarization curves of  $\text{RuO}_2$  for UOR and OER in 1 M KOH without and with 0.5 M urea. (b) Polarization curves of Pt/C(20%) for HER in 1 M KOH without and with 0.5 M urea. (c) Polarization curves of  $\text{RuO}_2 \parallel \text{Pt/C}$ (20%) for water electrolysis and urea electrolysis. Scan rate:  $2 \text{ mV s}^{-1}$ .

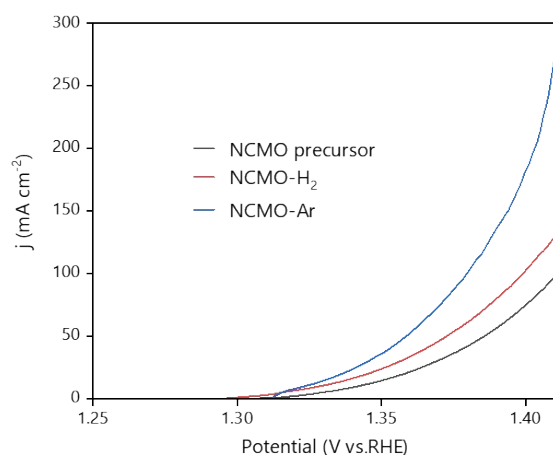

**Figure S4.** Comparison of the UOR activities of the NCMO precursor, NCMO-H<sub>2</sub>, and NCMO-Ar. Scan rate: 2 mV s<sup>-1</sup>.

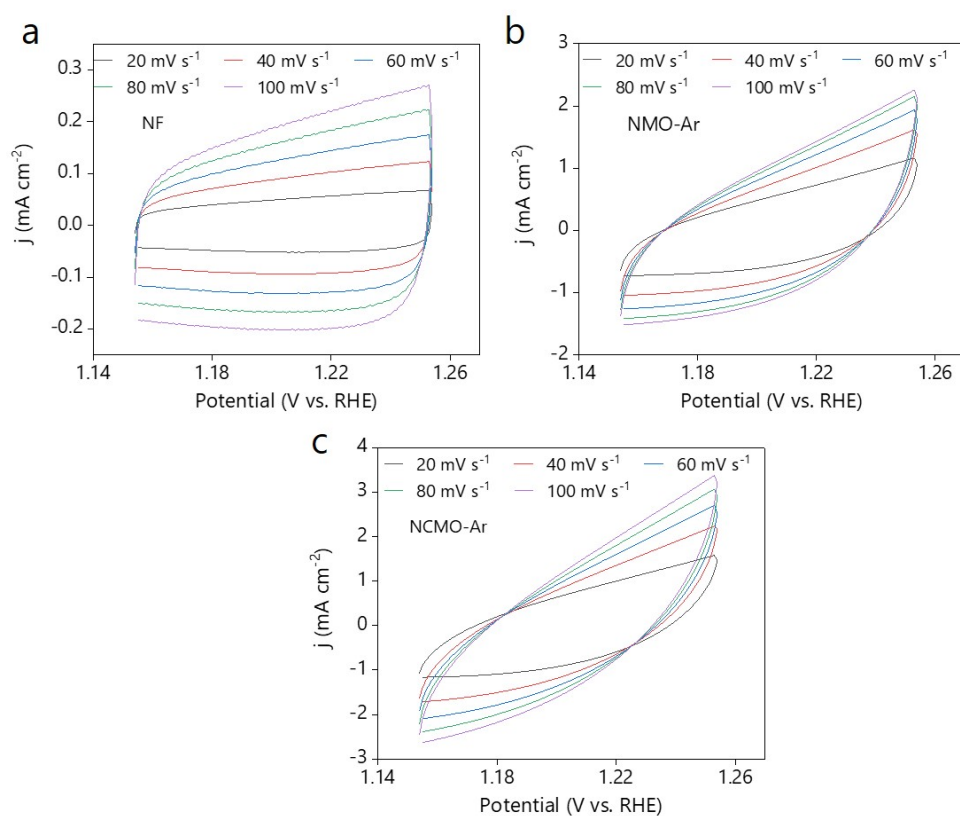

**Figure S5.** CV plots of (a) NF, (b) NMO-Ar, and (c) NCMO-Ar in 1 M KOH with 0.5 M urea at different scan rates from 1.154 V to 1.254 V.

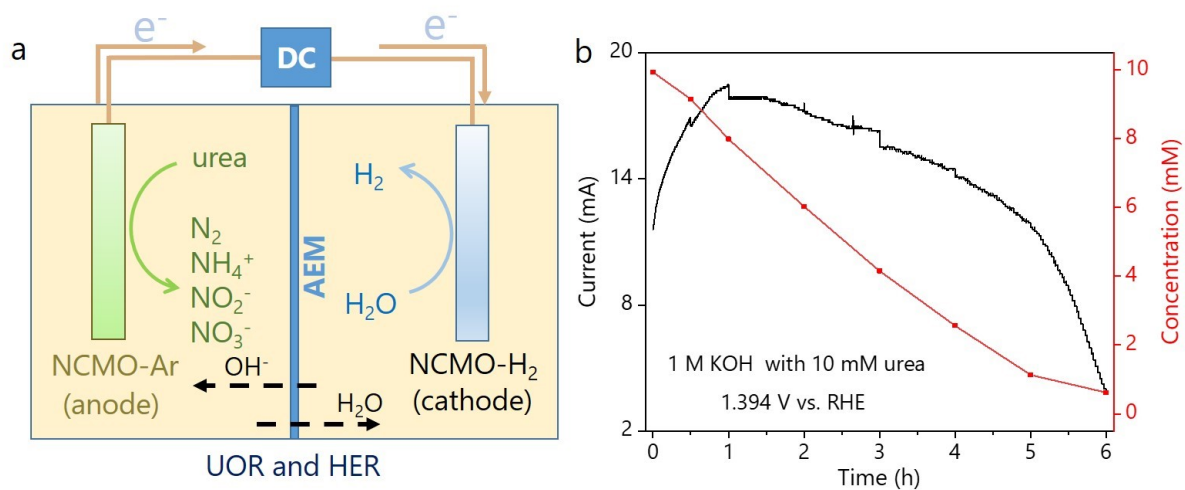

**Figure S6.** Urea oxidation in the NCMO-Ar anodic system at 1.394 V without iR correction.

(a) Schematic of dual-chamber electrolysis cell with the anion exchange membrane (AEM).

(b) The evolutions of anodic current and urea concentration during the 6 hr test in 1 M KOH with 10 mM urea.



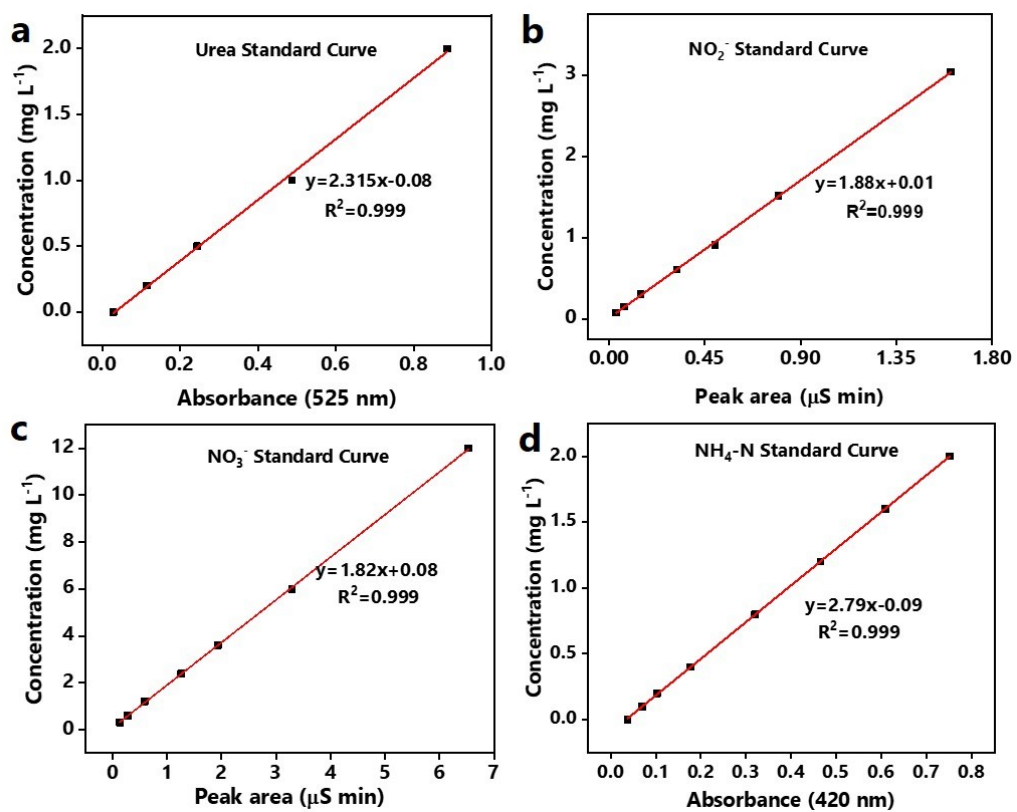

**Figure S7.** Calibration curves for (a) urea measurement by UV-VIS (TU-1901), (b) NO<sub>2</sub><sup>-</sup> and (c) NO<sub>3</sub><sup>-</sup> measurement by IC, and (d) NH<sub>4</sub>-N measurement by UV-VIS (T6).

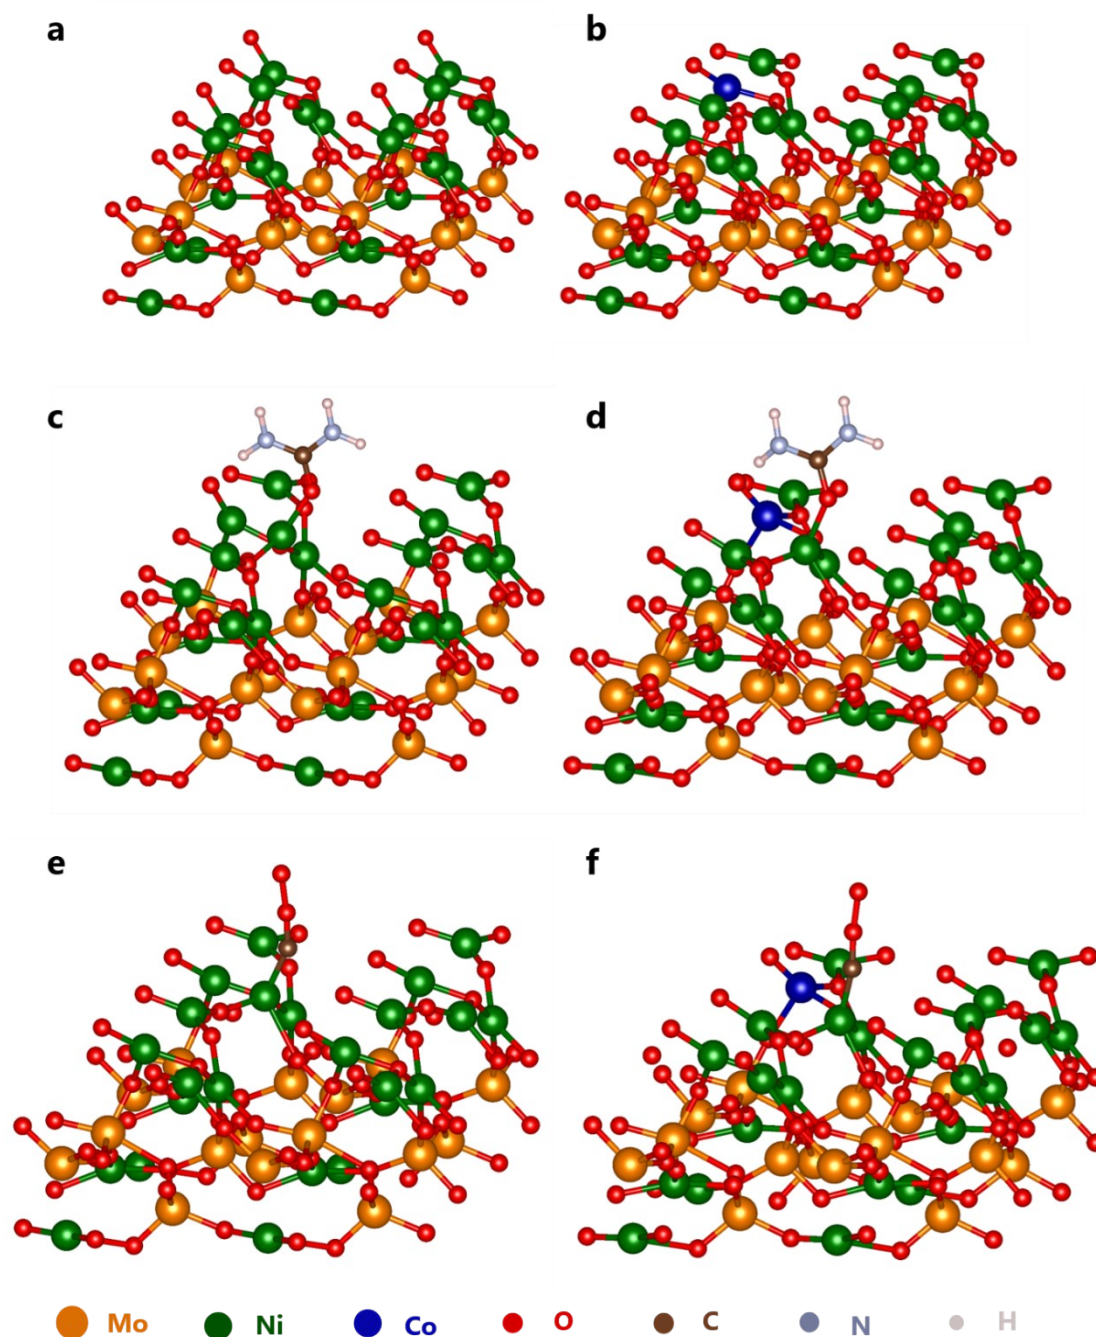

**Figure S8.** Optimized structures of (a) NMO-Ar, (b) NCMO-Ar, (c) NMO-Ar-urea\*, (d) NCMO-Ar-urea\*, (e) NMO-Ar-\*COO, and (f) NCMO-Ar-\*COO in DFT simulation. The blue, green, orange, brownness, silver, red, and light pink sphere represents the Co, Ni, Mo, C, N, O, and H atom, respectively.

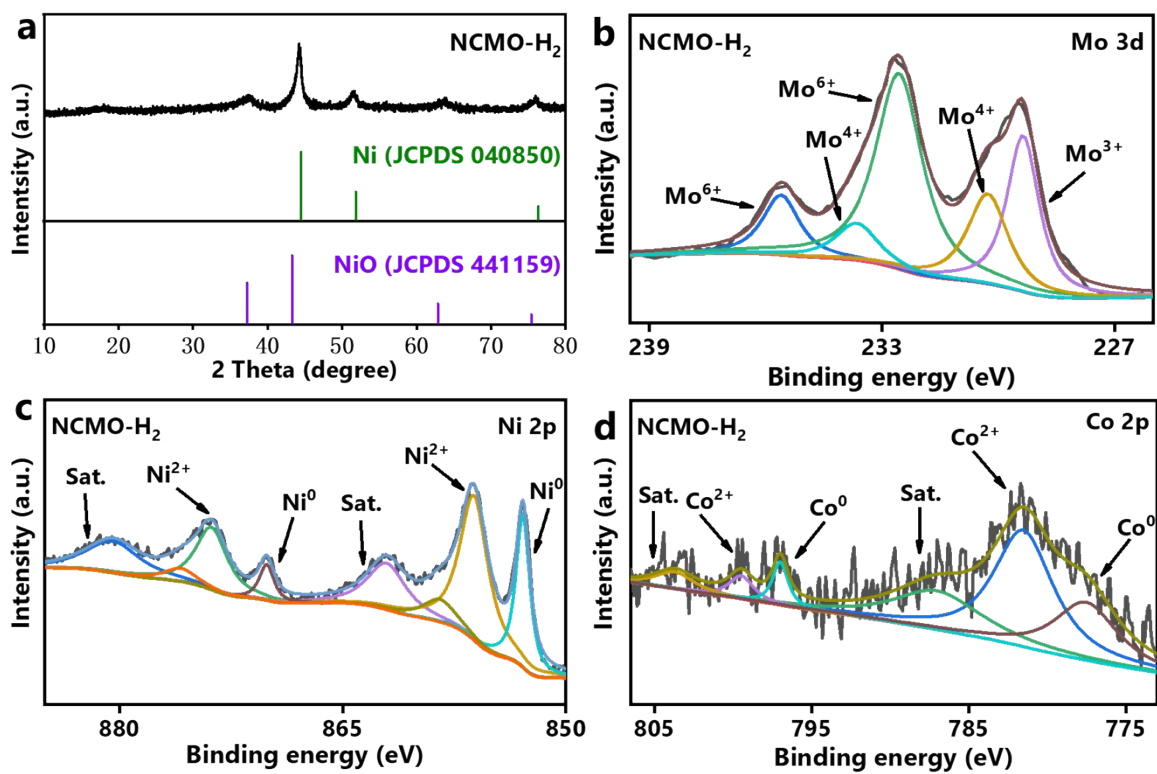

**Figure S9.** (a) XRD patterns of NCMO-H<sub>2</sub>. (b-d) XPS spectra of Mo 3d, Ni 2p, and Co 2p in NCMO-H<sub>2</sub>.

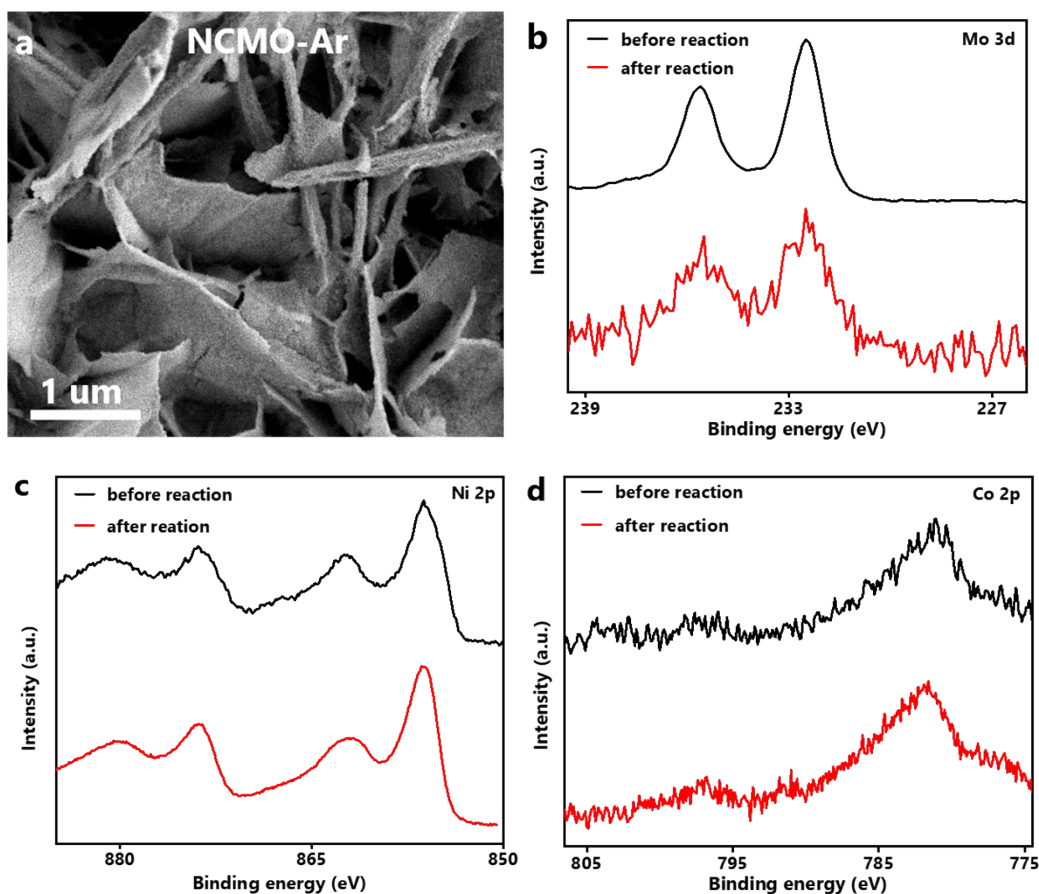

**Figure S10.** SEM image of (a) NCMO-Ar after 200 h electrolysis at  $100 \text{ mA cm}^{-2}$ . XPS spectra of (b) Mo 3d, (c) Ni 2p, and (d) Co 2p of NCMO-Ar before and after 200 h electrolysis at  $100 \text{ mA cm}^{-2}$ .

**Table S1.** The Ni and Co contents in NCMO-Ar and NCMO-H<sub>2</sub>.

| <b>Catalyst</b>     | <b>Content (at.%)</b> |           |
|---------------------|-----------------------|-----------|
|                     | <b>Ni</b>             | <b>Co</b> |
| NCMO-Ar             | 49.60                 | 1.83      |
| NCMO-H <sub>2</sub> | 69.01                 | 1.71      |

**Table S2.** Comparison of the UOR activity of NCMO-Ar with representative Ni-based catalysts.

| Catalyst                               | Electrolyte           | Scan rate<br>(mV s <sup>-1</sup> ) | Potential (mV)                                                                                      | Ref.                                                                  |
|----------------------------------------|-----------------------|------------------------------------|-----------------------------------------------------------------------------------------------------|-----------------------------------------------------------------------|
| NCMO-Ar                                | 1 M KOH + 0.5 M urea  | 2                                  | 1.324 @ 10 mA cm <sup>-2</sup><br>1.38 @ 100 mA cm <sup>-2</sup><br>1.404 @ 200 mA cm <sup>-2</sup> | This work                                                             |
| NF/NiMoO-Ar                            | 1 M KOH + 0.5 M urea  | 2                                  | 1.37 @ 10 mA cm <sup>-2</sup>                                                                       | <i>Energy Environ. Sci.</i> <b>2018</b> , 11, 1890. <sup>[8]</sup>    |
| r-NiMoO <sub>4</sub> /NF               | 1 M KOH + 0.5 M urea  | 5                                  | 1.60 V @ 249.5 mA cm <sup>-2</sup>                                                                  | <i>ACS Catal.</i> <b>2018</b> , 8, 1. <sup>[9]</sup>                  |
| Ni-WO <sub>x</sub>                     | 1 M KOH + 0.33 M urea | 10                                 | 1.4 @ 100 mA cm <sup>-2</sup>                                                                       | <i>Angew. Chem. Int. Ed.</i> <b>2021</b> , 60, 10577. <sup>[10]</sup> |
| NiClO-D                                | 1 M KOH + 0.33 M urea | 5                                  | 1.60 V @ 264 mA cm <sup>-2</sup>                                                                    | <i>Angew. Chem. Int. Ed.</i> <b>2019</b> , 58, 16820. <sup>[11]</sup> |
| NCVS                                   | 1 M KOH + 0.33 M urea | 5                                  | 1.35 @ 10 mA cm <sup>-2</sup>                                                                       | <i>ACS Catal.</i> <b>2021</b> , 12, 569. <sup>[12]</sup>              |
| Ni <sub>2</sub> P/MoO <sub>2</sub> /NF | 1 M KOH + 0.5 M urea  | 2                                  | 1.35 @ 10 mA cm <sup>-2</sup>                                                                       | <i>Appl. Catal. B</i> <b>2020</b> , 269, 118803. <sup>[13]</sup>      |
| Ni-MOF                                 | 1 M KOH + 0.5 M urea  | 5                                  | 1.381 @ 10 mA cm <sup>-2</sup>                                                                      | <i>Chem. Eng. J.</i> <b>2020</b> , 395, 125166. <sup>[14]</sup>       |

NF: nickel foam

r-NiMoO<sub>4</sub>: oxygen-vacancy-rich NiMoO<sub>4</sub>

NiClO-D: NiClOH derived catalyst

NCVS: Co, V co-doped NiS<sub>2</sub>

**Table S3.** Comparison of the HER activity of NCMO-H<sub>2</sub> with representative HER catalysts.

| Catalyst                                               | Electrolyte           | Scan rate<br>(mV s <sup>-1</sup> ) | Potential (mV)                                               | Ref.                                                                |
|--------------------------------------------------------|-----------------------|------------------------------------|--------------------------------------------------------------|---------------------------------------------------------------------|
| NCMO-H <sub>2</sub>                                    | 1 M KOH + 0.5 M urea  | 2                                  | 26 @ 10 mA cm <sup>-2</sup><br>85 @ 100 mA cm <sup>-2</sup>  | This work                                                           |
| Co <sub>2</sub> Mo <sub>3</sub> O <sub>8</sub>         | 1 M KOH + 0.5 M urea  | 1                                  | 37 @ 10 mA cm <sup>-2</sup><br>140 @ 100 mA cm <sup>-2</sup> | <i>Nano Energy</i> <b>2021</b> , 87, 106217. <sup>[15]</sup>        |
| Rh <sub>SA</sub> -S-Co <sub>3</sub> O <sub>4</sub>     | 1 M KOH + 0.5 M urea  | 2                                  | 45 @ 10 mA cm <sup>-2</sup>                                  | <i>Energy Environ. Sci.</i> <b>2021</b> , 14, 6494. <sup>[16]</sup> |
| Ru-Co <sub>2</sub> P/N-C/NF                            | 1 M KOH + 0.5 M urea  | 5                                  | 65 @ 10 mA cm <sup>-2</sup>                                  | <i>Chem. Eng. J.</i> <b>2021</b> , 408, 127308. <sup>[17]</sup>     |
| Ni-Mo nanotube                                         | 1 M KOH + 0.1 M urea  | 5                                  | 44 @ 10 mA cm <sup>-2</sup>                                  | <i>Nano Energy</i> <b>2019</b> , 60, 894. <sup>[18]</sup>           |
| Ni <sub>1.6</sub> Co <sub>0.4</sub> P/C@HCNs           | 1 M KOH + 0.33 M urea | 5                                  | 145 @ 10 mA cm <sup>-2</sup>                                 | <i>Nanoscale</i> <b>2020</b> , 12, 16123. <sup>[19]</sup>           |
| MnO <sub>2</sub> /MnCo <sub>2</sub> O <sub>4</sub> /Ni | 1 M KOH + 0.5 M urea  | 5                                  | 200 @ 10 mA cm <sup>-2</sup>                                 | <i>J. Mater. Chem. A</i> <b>2017</b> , 5, 7825. <sup>[20]</sup>     |

NF: nickel foam

Rh<sub>SA</sub>-S-Co<sub>3</sub>O<sub>4</sub>: Rh single-atom-strain on the surface of a Co<sub>3</sub>O<sub>4</sub>

HCNs: hollow carbon nanospheres

**Table S4.** Performance comparison of representative urea electrolysis systems.

| Catalyst                                           | Electrolyte          | Voltage (V) @<br>10 mA cm <sup>-2</sup> | Stability                       | Ref.                                                                     |
|----------------------------------------------------|----------------------|-----------------------------------------|---------------------------------|--------------------------------------------------------------------------|
| NCMO-Ar   <br>NCMO-H <sub>2</sub>                  | 1 M KOH + 0.5 M urea | 1.342 V                                 | 200 h @ 100 mA cm <sup>-2</sup> | <b>This work</b>                                                         |
| Rh <sub>SA</sub> -S-Co <sub>3</sub> O <sub>4</sub> | 1 M KOH + 0.5 M urea | 1.33 V                                  | 100 h @ 100 mA cm <sup>-2</sup> | <i>Energy Environ. Sci.</i><br><b>2021</b> , 14, 6494. <sup>[16]</sup>   |
| P-Mo-Ni(OH) <sub>2</sub>                           | 1 M KOH + 0.1 M urea | 1.36 V                                  | 80 h @ 1.80 V                   | <i>Appl. Catal. B</i> <b>2020</b> ,<br>260, 118154. <sup>[21]</sup>      |
| P-CoNi <sub>2</sub> S <sub>4</sub>                 | 1 M KOH + 1 M urea   | 1.402 V                                 | 100 h @ 10 mA cm <sup>-2</sup>  | <i>Angew. Chem. Int. Ed.</i><br><b>2021</b> , 60, 22885. <sup>[22]</sup> |
| Ni <sub>2</sub> Fe(CN) <sub>6</sub>                | 1 M KOH + 0.5 M urea | 1.38 V                                  | 1 h @ different voltage         | <i>Nat. Energy</i> <b>2021</b> , 6,<br>904. <sup>[23]</sup>              |
| O-NiMoP/NF                                         | 1 M KOH + 0.5 M urea | 1.36 V                                  | 10 h @ 20 mA cm <sup>-2</sup>   | <i>Adv. Funct. Mater.</i><br><b>2021</b> , 31, 2104951. <sup>[24]</sup>  |
| CoMn/CoMn <sub>2</sub> O <sub>4</sub>              | 1 M KOH + 0.5 M urea | 1.51 V                                  | 16.67 h @ 1.68 V                | <i>Adv. Funct. Mater.</i><br><b>2020</b> , 30, 2000556. <sup>[25]</sup>  |
| Ni@NCNT                                            | 1 M KOH + 0.5 M urea | 1.56 V                                  | 10 h @ 10 mA cm <sup>-2</sup>   | <i>Appl. Catal. B</i> <b>2021</b> ,<br>280, 119436. <sup>[26]</sup>      |

NF: nickel foam

Rh<sub>SA</sub>-S-Co<sub>3</sub>O<sub>4</sub>: Rh single-atom-strain on the surface of a Co<sub>3</sub>O<sub>4</sub>P-Mo-Ni(OH)<sub>2</sub>: plasma-activated Mo-Ni(OH)<sub>2</sub>P-CoNi<sub>2</sub>S<sub>4</sub>: phosphorized CoNi<sub>2</sub>S<sub>4</sub>

O-NiMoP: oxygen-incorporated NiMoP

NCNT: nitrogen-doped carbon nanotubes



## REFERENCES

- [1] C. Lv, L. Zhong, H. Liu, Z. Fang, C. Yan, M. Chen, Y. Kong, C. Lee, D. Liu, S. Li, J. Liu, S. Li, G. Chen, Q. Yan, G. Yu, *Nat. Sustain.* **2021**, 4, 868.
- [2] G. Kresse, J. Furthmüller, *Comput. Mater. Sci.* **1996**, 6, 15.
- [3] G. Kresse, J. Furthmüller, *Phys. Rev. B* **1996**, 54, 11169.
- [4] J. P. Perdew, K. Burke, M. Ernzerhof, *Phys. Rev. Lett.* **1996**, 77, 3865.
- [5] G. Kresse, D. Joubert, *Phys. Rev. B* **1999**, 59, 1758.
- [6] P. E. Blochl, *Phys. Rev. B* **1994**, 50, 17953.
- [7] S. Grimme, J. Antony, S. Ehrlich, H. Krieg, *J. Chem. Phys.* **2010**, 132, 154104 154104.
- [8] Z. Y. Yu, C. C. Lang, M. R. Gao, Y. Chen, Q. Q. Fu, Y. Duan, S. H. Yu, *Energy Environ. Sci.* **2018**, 11, 1890.
- [9] Y. Tong, P. Chen, M. Zhang, T. Zhou, L. Zhang, W. Chu, C. Wu, Y. Xie, *ACS Catal.* **2018**, 8, 1.
- [10] B. Zhang, L. Wang, Y. Zhu, Y. Wen, S. Li, C. Cui, F. Ni, Y. Liu, H. Lin, Y. Li, H. Peng, *Angew. Chem. Int. Ed.* **2021**, 60, 10577.
- [11] L. Zhang, L. Wang, H. Lin, Y. Liu, J. Ye, Y. Wen, A. Chen, L. Wang, F. Ni, Z. Zhou, S. Sun, Y. Li, B. Zhang, H. Peng, *Angew. Chem. Int. Ed.* **2019**, 58, 16820.
- [12] Z. Ji, Y. Song, S. Zhao, Y. Li, J. Liu, W. Hu, *ACS Catal.* **2021**, 12, 569.
- [13] M. Yang, Y. Jiang, M. Qu, Y. Qin, Y. Wang, W. Shen, R. He, W. Su, M. Li, *Appl. Catal. B* **2020**, 269, 118803.
- [14] S. S. Zheng, Y. Zheng, H. G. Xue, H. Pang, *Chem. Eng. J.* **2020**, 395, 125166, 125166.
- [15] K. Zhang, C. Liu, N. Graham, G. Zhang, W. Yu, *Nano Energy* **2021**, 87, 106217, 106217.
- [16] A. Kumar, X. Liu, J. Lee, B. Debnath, A. R. Jadhav, X. Shao, V. Q. Bui, Y. Hwang, Y. Liu, M. G. Kim, H. Lee, *Energy Environ. Sci.* **2021**, 14, 6494.
- [17] Y. Xu, T. Ren, K. Ren, S. Yu, M. Liu, Z. Wang, X. Li, L. Wang, H. Wang, *Chem. Eng. J.* **2021**, 408, 127308, 127308.
- [18] J.-Y. Zhang, T. He, M. Wang, R. Qi, Y. Yan, Z. Dong, H. Liu, H. Wang, B. Y. Xia, *Nano Energy* **2019**, 60, 894.
- [19] S. Rezaee, S. Shahrokhian, *Nanoscale* **2020**, 12, 16123.
- [20] C. Xiao, S. Li, X. Zhang, D. R. MacFarlane, *J. Mater. Chem. A* **2017**, 5, 7825.
- [21] W. Zhang, Y. Tang, L. Yu, X.-Y. Yu, *Appl. Catal. B* **2020**, 260, 118154, 118154.
- [22] X.-W. D. Lou, *Angew. Chem. Int. Ed.* **2021**, 60, 22885.
- [23] S.-K. Geng, Y. Zheng, S.-Q. Li, H. Su, X. Zhao, J. Hu, H.-B. Shu, M. Jaroniec, P. Chen, Q.-H. Liu, S.-Z. Qiao, *Nat. Energy* **2021**, 6, 904.
- [24] H. Jiang, M. Sun, S. Wu, B. Huang, C.-S. Lee, W. Zhang, *Adv. Funct. Mater.* **2021**, 31, 2104951.
- [25] C. Wang, H. Lu, Z. Mao, C. Yan, G. Shen, X. Wang, *Adv. Funct. Mater.* **2020**, 30, 2000556.
- [26] Q. Zhang, F. M. D. Kazim, S. Ma, K. Qu, M. Li, Y. Wang, H. Hu, W. Cai, Z. Yang, *Appl. Catal. B* **2021**, 280, 119436.
